# Supplementary material
Source: Research Square preprint supplement (doi:10.21203/rs.3.rs-8464028/v1)
Supplement: Supplementary file 1 [file 49bf28d39b8214f3eb2f24c0.docx]

# Supplementary Information

A Quantum-Inspired Framework for Real-Time Trust Estimation in Human-AI Interaction: A Pilot Study

**Supplementary Methods: LLM prompts and parameters**

**Model:** gpt-4o-mini
**API:** OpenAI Chat Completions API
**Prompting scheme:** One fixed system prompt + one user message per turn
**Temperature:** 0
**Top-p:** 1.0

**Max Tokens:** 10
**Post-processing:** direct float parsing

**Prompt (Sentiment Extraction):**

**“**Your task is to analyze the sentence given to you and tell me its sentiment. Give it a score ranging from -1 to 1 depending on how positive it is. (e.g. Anything greater then 0 is positve and anything below 0 is negative AND 0 is exactly neutral). Only give me a number and nothing else. For example if I put “I hate you”, that is very negative so the answer would be very close to -1. The closer to the 1 or -1 the better the sentiment. Factor in the exclamation marks, extra question marks for frustation, capitalizations for urgency and frustation etc. All of these could affect the sentiment. If the user is just asking a simple question (for example, I am choking, what should I do?) that should be near to neutral (0). It is important that you factor in the context while deciding on a sentiment. Make sure to look at the conversations above the one being judged in order to give an accurate number.”

**Prompt (Accuracy Extraction - This measure represents a proxy for perceived factual confidence rather than verified factual correctness.):**

“Your task is to analyze the text given to you and tell me its accuracy (i.e. fact check). Give it a score ranging from -1 to 1 depending on how accurate it is. (e.g. Anything greater than 0 is going towards accuracy and anything below 0 is going towards inaccuracy). You can get a number in between 0, 1 and -1 as well if some parts of the text are true and others are false. For example, if you have text of 2 sentences and one of them is completely false while other is completely correct, it should be around 0.5. Give a score of 0 for sentences that seem to be opinions or subjective as well as ones that are not fact checkable (i.e. response to Hello). Only give me a number and nothing else.”

**Supplementary Tables:**

Table S1: Notation and parameter definitions

| Symbol | Meaning | Range/units | How obtained |
| --- | --- | --- | --- |
| *t* | Turn index | *t=1,2,…* | Conversation turn counter |
| *β* | Initial trust (self-report) | 0-10 | Collected preinteraction |
| *risk* | Perceived risk (self-report) | 0-10 | Collected preinteraction |
| *conf* | User prior knowledge/confidence (self-report) | 0-10 | Collected preinteraction |
| *αt* | Sentiment score at turn *t* | [−1,1] | LLM-based sentiment on user text |
| *clart* | Clarity score at turn *t* | [0,1] | Normalized TextStat composite |
| *εt* | Follow-up question count | Integer | Running count over conversation |
| *δt* | Dilution (stabilization) factor | *δ1* = 1, then per turn | Deterministic schedule |
| *θ* | Rotation angle for a gate | radians | Computed from inputs below |
| *γt* | Trust “anchor” angle used in CRY equations | radians | Derived from reduced qubit state (Bloch angle) after each turn |
| *St-1* | Cumulative sentiment rotation applied up to turn *t-1* | radians | Classical bookkeeping of cumulative sentiment rotations |
| *ρt* | Reliance “anchor” angle used in CRY equations | radians | Derived from reduced qubit state (Bloch angle) after each turn |
| *Ct-1* | Cumulative TCR rotation applied up to turn *t-1* | radians | Classical bookkeeping of cumulative TCR rotations |
|  | Marginal probability trust qubit is | [0,1] | From statevector after turn *t* |
|  | Calculated trust estimate | [0,100] |  |

Table S2: Gate/update schedule

| **Phase** | **Step** | **Operation** | **Qubits** | **Notes** |
| --- | --- | --- | --- | --- |
| Preinteraction | 0 | Initialize all qubits | All | Start in |
|  | 1 | Hadamard | 0 | H(*q0*​) |
|  | 2 | Initial trust rotation | 0 |  |
|  | 3 | Risk rotation | 0 |  |
|  | 4 | Prior confidence → Reliance init. | 2 |  |
| Turn (*t*) loop | 1 | Compute features from turn (t) | - | |  | | --- | |
|  | 2 | Sentiment update rotation | 1 |  |
|  | 3 | Sentiment → Trust coupling | 1→0 | |  | | --- |  |  | | --- | |
|  | 4 | TCR proxy rotation (if ) | 3 |  |
|  | 5 | TCR → Reliance coupling | 3→2 |  |
|  | 6 | Clarity rotation | 4 |  |
|  | 7 | Clarity → Reliance coupling | 4→2 |  |
|  | 8 | Accuracy rotation | 5 |  |
|  | 9 | Accuracy → Reliance coupling | 5→2 |  |
|  | 10 | Reliance → Trust coupling | 2→0 |  |
| Output per turn | 11 | Compute trust output | 0 |  |
